# Supplementary material
Source: PubMed Central journal article supplement (PMC518776)

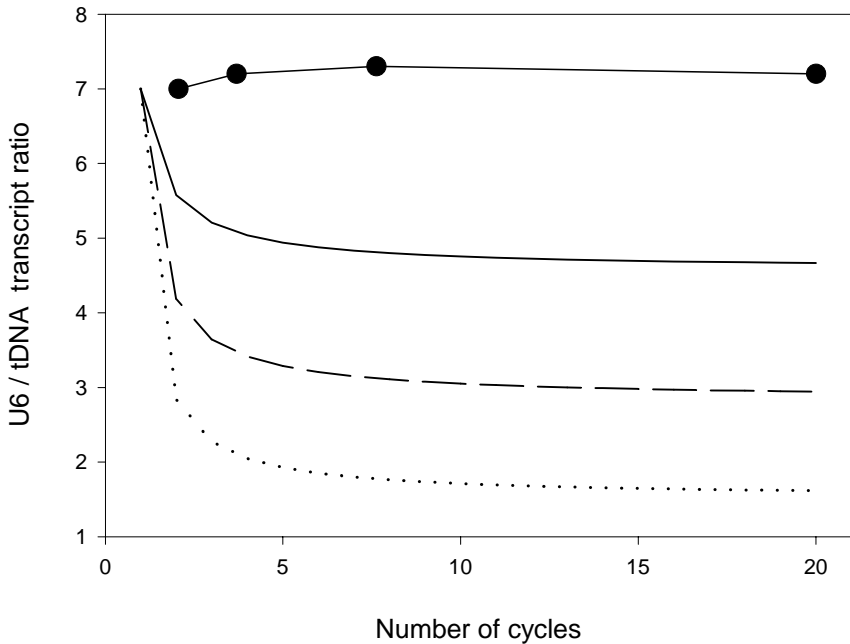

Supplement: pnas_101_37_13442__2.pdf [file pnas_101_37_13442__2.pdf]

B'' B'' rBdp1

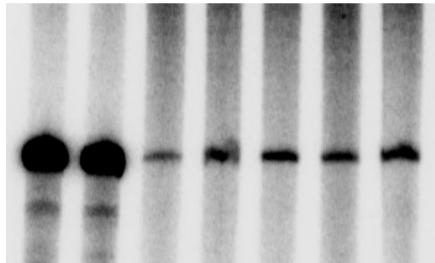

1 2 3 4 5 6 7

B'' B'' — rBdp1

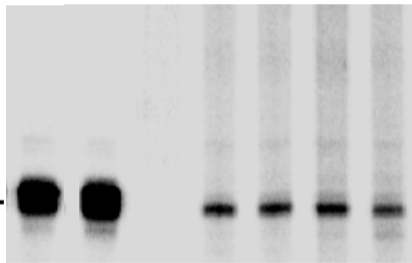

8 9 10 11 12 13 14

Supplement: pnas_101_37_13442__3.pdf [file pnas_101_37_13442__3.pdf]

**A**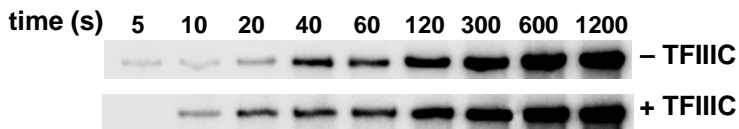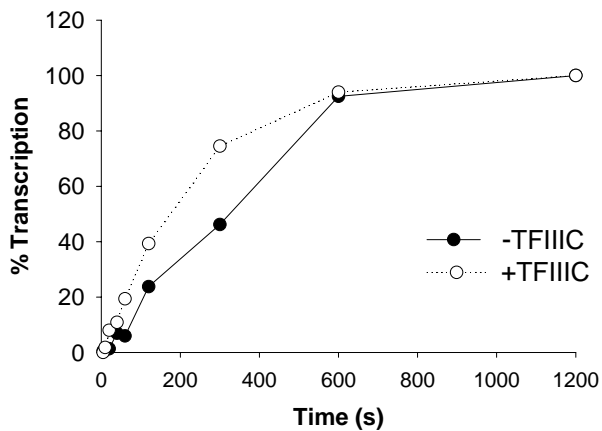**B****+ IIC****- IIC**

Time (s) 0 10 20 25 30 35 45 60 120

0 10 20 25 30 35 45 60 120

scRNA

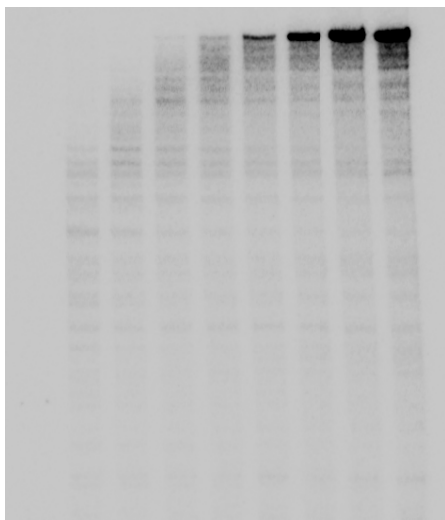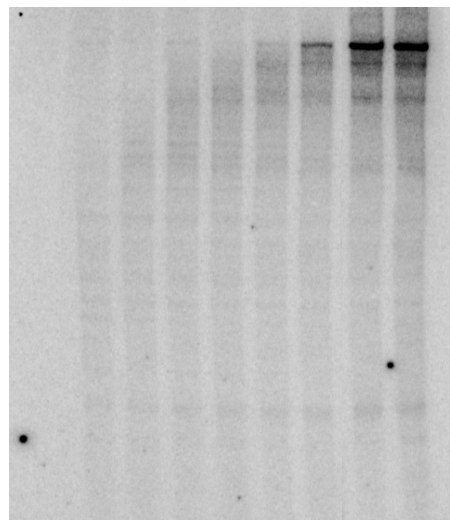

1 2 3 4 5 6 7 8 9

1 2 3 4 5 6 7 8 9

Supplement: pnas_101_37_13442__4.pdf [file pnas_101_37_13442__4.pdf]

# SCR1

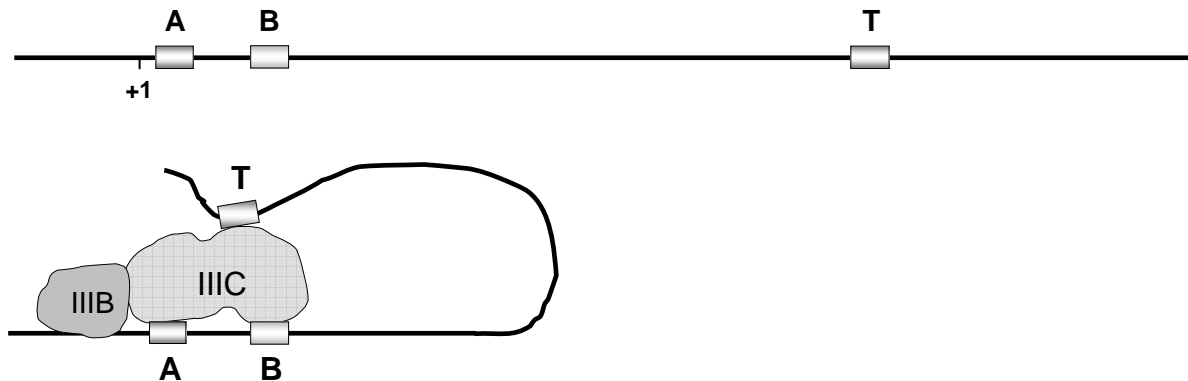

# SNR6\_520

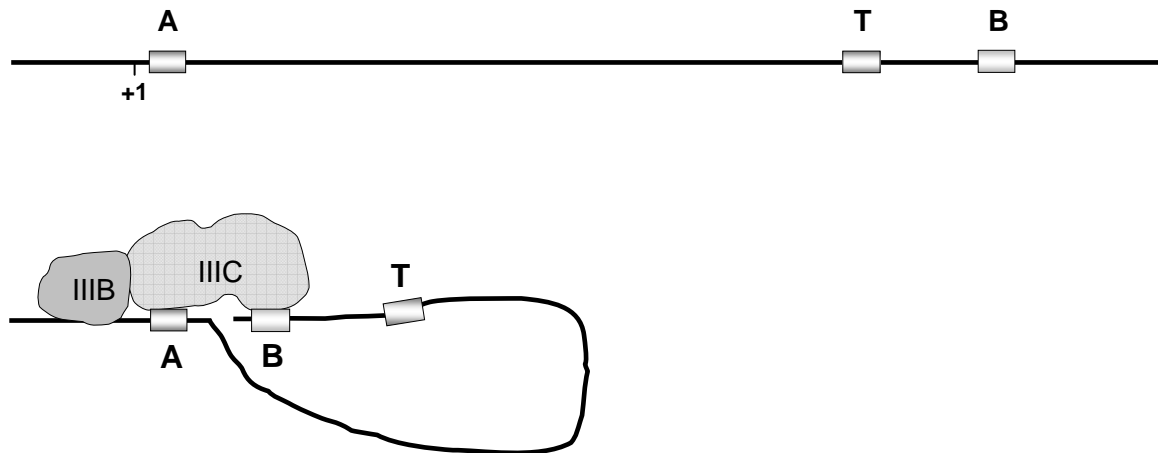

Supplement: pnas_101_37_13442__5.pdf [file pnas_101_37_13442__5.pdf]
